# Supplementary material
Source: PubMed Central journal article supplement (PMC4733623)
Supplement: NIHMS752017-supplement-Tab_1.pdf [file NIHMS752017-supplement-Tab_1.pdf]

Supplementary Table S1

Pairs of complementary oligonucleotides used to produce deletion mutants of exon 3, 4, 7, 9 or 11 of the *PRKARIA* gene. A *PRKARIA* cDNA sequence was inserted in a plasmid and mutated by site directed mutagenesis. These mutated cDNA sequences were used as controls to set up the MLPA technique.

Exon3 :

5' -gatttctcctcctccacccaacgcatcctatgttagaaagg- 3'  
5' -cctttctaacaataggatgcggtgggtggaggaggagaaatc- 3'

Exon 4

5' -tgcggcatcctatgttagaaagatccttgatgataatgagaga- 3'  
5' -cttctctcattatcatcaagatctaacaataggatgccg 3'

Exon7

5' -agggagctttggagaacttgctttagaatcctcatgg- 3'  
5' -ccatgaggattcctaaagcaagttctccaaagctccct- 3'

Exon9

5' -ctctggacaagtgggaacttatttttagaggggtcag- 3'  
5' -ctgaccctctaaaataagttcccacttgccagag- 3'

Exon 11

5' -gctcgtggccccttgaacactgtctgtctga- 3'  
5' -tcagacagacagtgttcaagggccacgagc- 3'

●Exon3-6

5' ctttgagaggttggagaaggtctatgttaacaatgaatg 3'  
5' cattcattgttaacatagaccttctccaacctctcaaag 3'
