# Supplementary material
Source: PubMed Central journal article supplement (PMC4733623)

WT

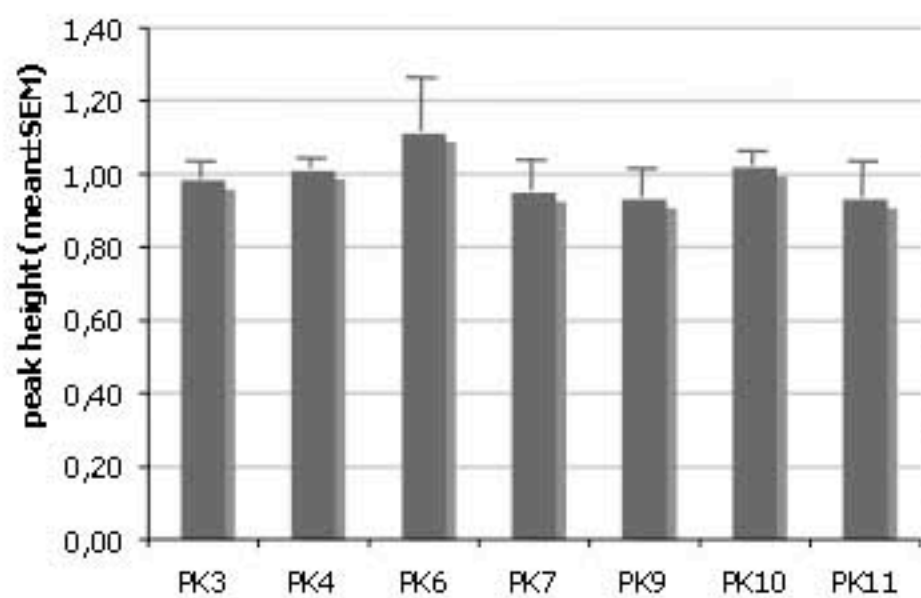 $\Delta$ Exon3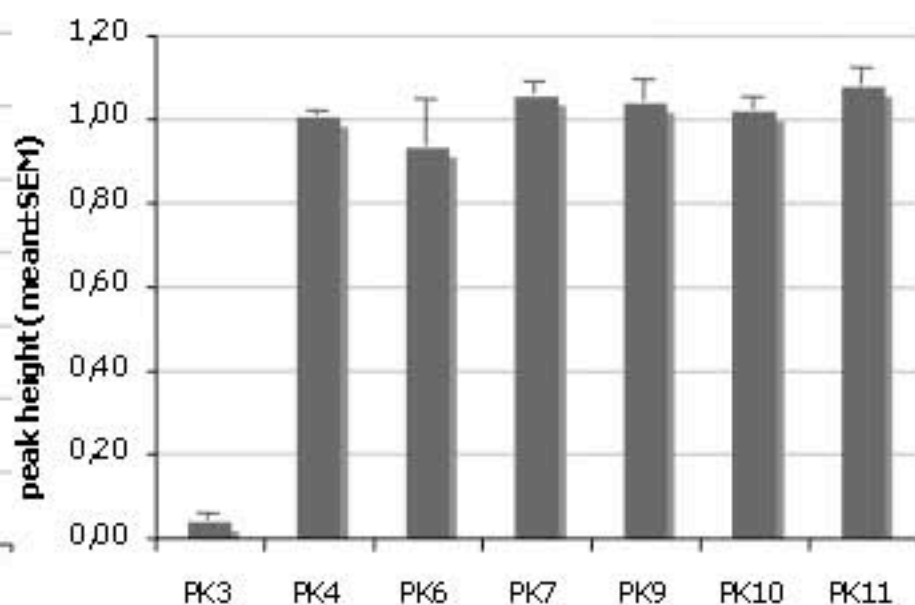 $\Delta$  exon4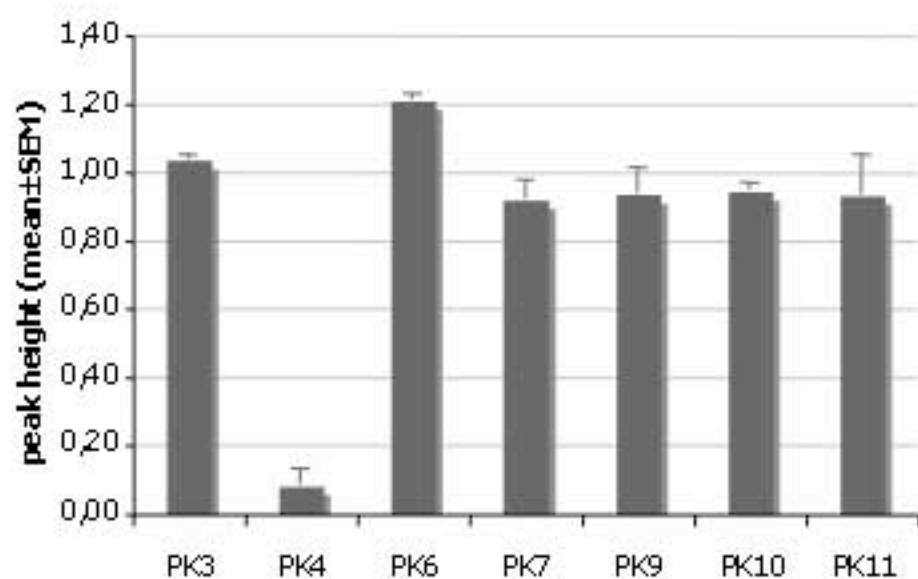 $\Delta$  exon7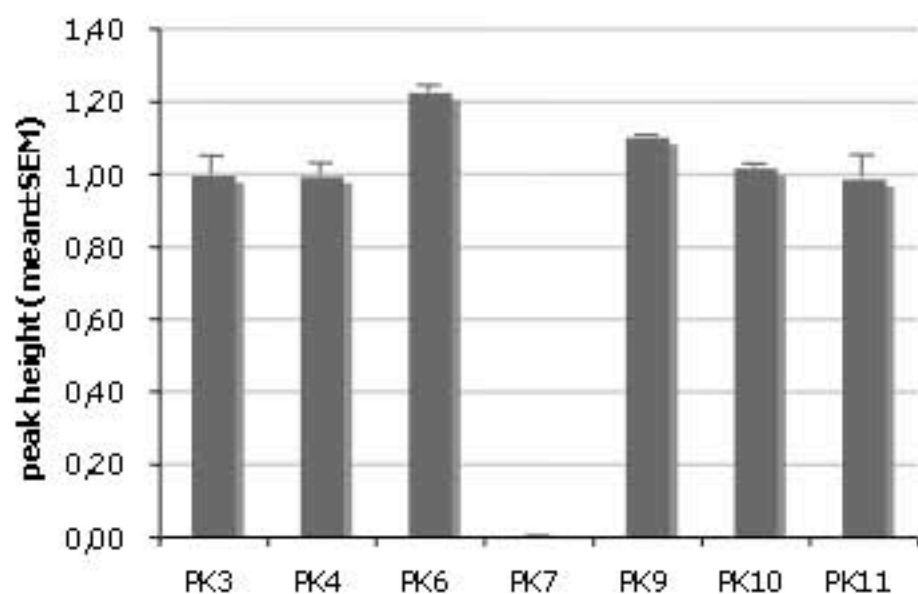 $\Delta$  exon9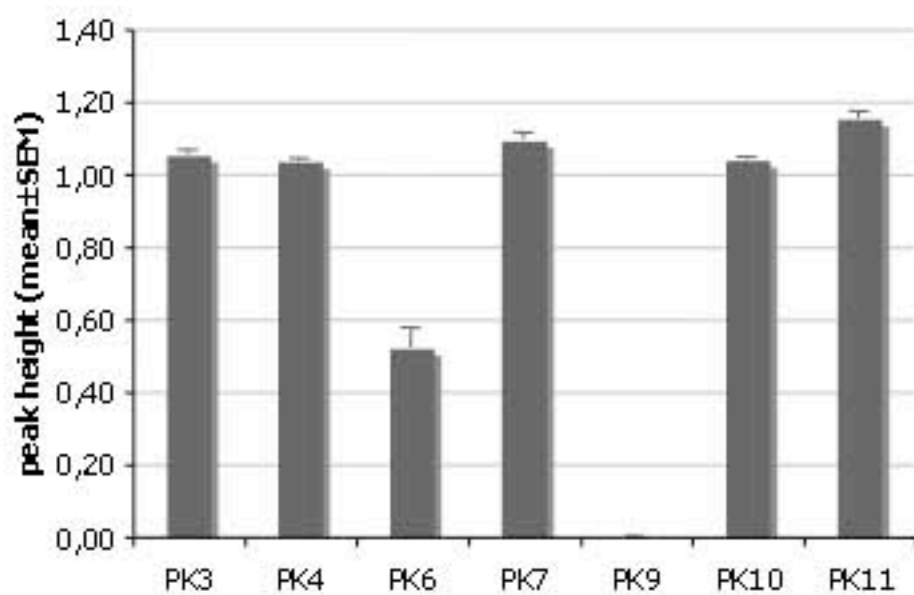 $\Delta$  exon11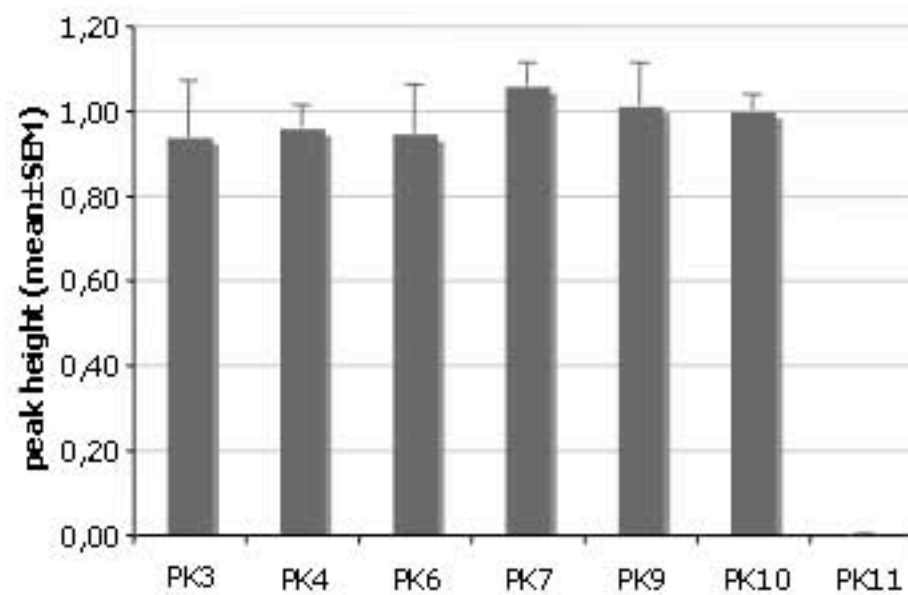

Supplement: NIHMS752017-supplement-Fig_1.pdf [file NIHMS752017-supplement-Fig_1.pdf]
